# Supplementary material
Source: HighWire-hosted journal article supplement (https://www.qdcxjkg.com/highwire/filestream/113300/field_highwire_adjunct_files/0/SONNENSCHEIN_breastfeeding_and_asthma-related_symptoms_revision2_supplementary_data_ERJ.pdf)
Supplement: SONNENSCHEIN_breastfeeding_and_asthma-related_symptoms_revision2_supplementary_data_ERJ.pdf [file SONNENSCHEIN_breastfeeding_and_asthma-related_symptoms_revision2_supplementary_data_ERJ.pdf]

## Supplementary material

### **Duration and exclusiveness of breastfeeding and childhood asthma-related symptoms.**

*Short title: Breastfeeding and asthma-related symptoms*

Agnes M.M. Sonnenschein-van der Voort, MSc<sup>1,2,3</sup>, Vincent V.W. Jaddoe, MD, PhD<sup>1,3,4</sup>,  
Ralf J.P. van der Valk, MSc<sup>1,2,3</sup>, Sten P. Willemsen, MSc<sup>5</sup>, Albert Hofman, MD, PhD<sup>3</sup>,  
Henriëtte A. Moll, MD, PhD<sup>4</sup>, Johan C. de Jongste, MD, PhD<sup>2</sup>, Liesbeth Duijts, MD, PhD<sup>1,2,3</sup>

<sup>1</sup>The Generation R Study Group, <sup>2</sup>Department of Pediatrics, Division of Respiratory Medicine,

<sup>3</sup>Department of Epidemiology, <sup>4</sup>Department of Pediatrics, <sup>5</sup>Department of Biostatistics;

Erasmus Medical Center, Rotterdam, The Netherlands

**Figure S1.** Flow chart of participants in study.

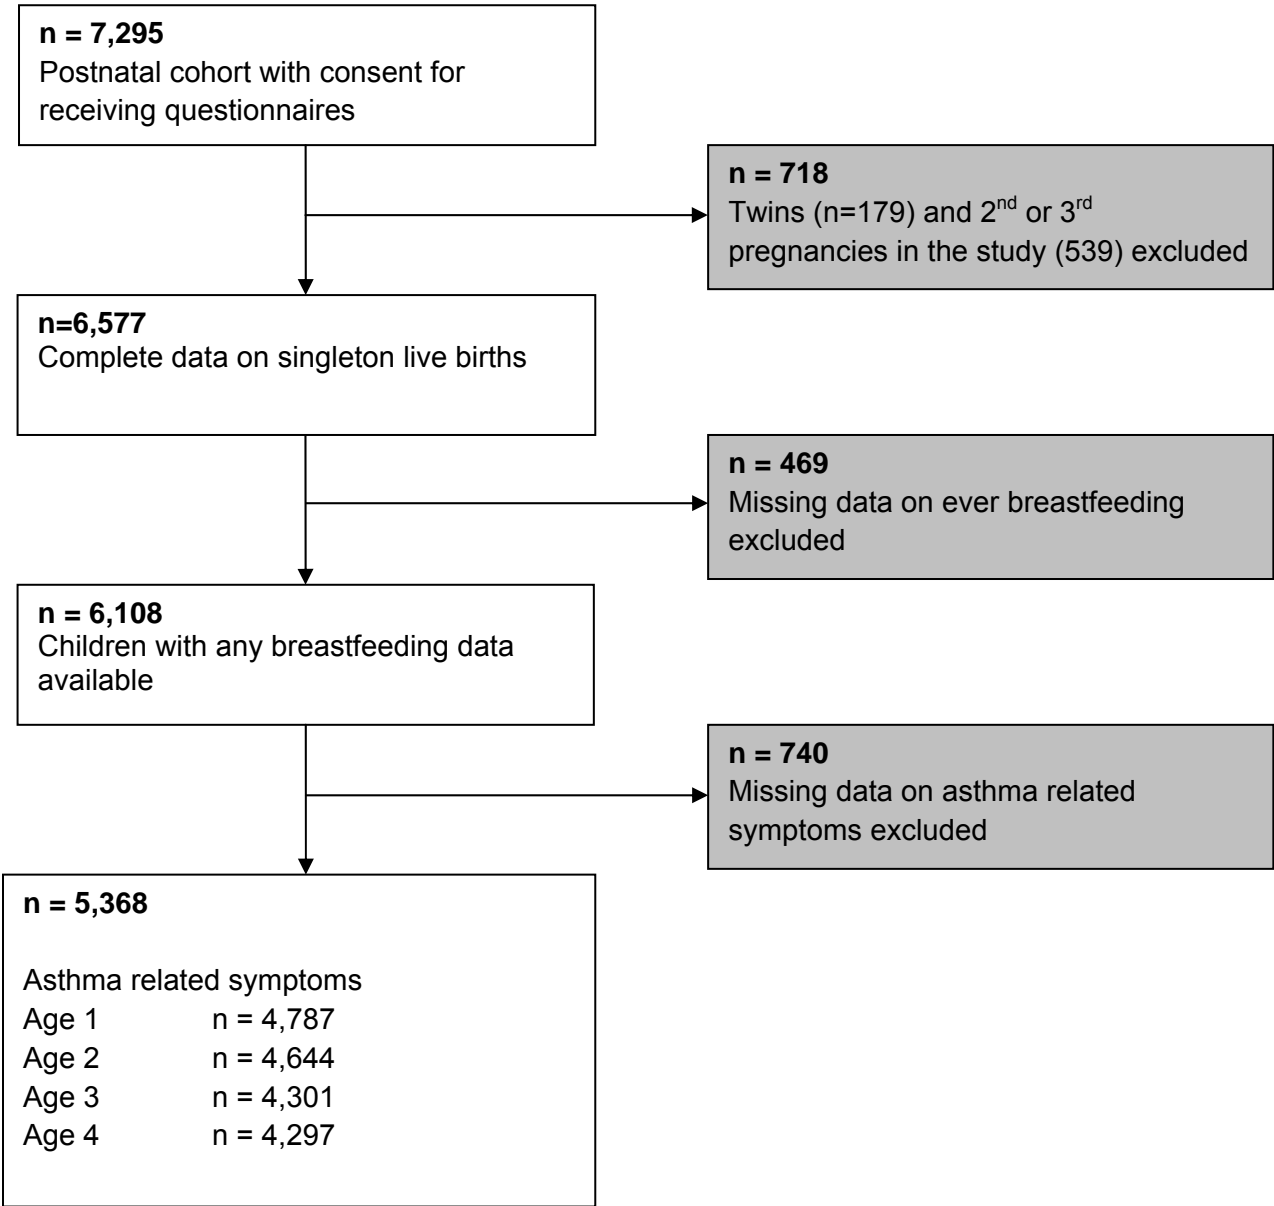

**Table S1.** Characteristics of children and their parents according to availability of data on asthma-related symptoms

|                                 | Singleton live births<br>(n=6,577)                     |                                                         | p-value |
|---------------------------------|--------------------------------------------------------|---------------------------------------------------------|---------|
|                                 | Asthma-related symptoms<br>data available<br>(n=5,665) | No asthma-related symptoms<br>data available<br>(n=912) |         |
| <b>Maternal characteristics</b> |                                                        |                                                         |         |
| Age (years)                     | 30.8 (4.9)                                             | 27.5 (5.6)                                              | p<0.001 |
| Education (%)                   |                                                        |                                                         |         |
| Primary, or secondary           | 45.5 (2,576)                                           | 60 (547)                                                |         |
| Higher                          | 48.0 (2,714)                                           | 12.4 (113)                                              | p<0.001 |
| Missing                         | 6.6 (375)                                              | 27.6 (252)                                              |         |
| Ethnicity (%)                   |                                                        |                                                         |         |
| European                        | 63.8 (3,612)                                           | 20.4 (186)                                              |         |
| Non - European                  | 31.5 (1,783)                                           | 54.4 (496)                                              | p<0.001 |
| Missing                         | 4.8 (270)                                              | 25.2 (230)                                              |         |
| Parity (%)                      |                                                        |                                                         |         |
| 0                               | 59.8 (3,388)                                           | 47.8 (436)                                              |         |
| ≥1                              | 36.9 (2,092)                                           | 48.1 (439)                                              | p<0.001 |
| Missing                         | 3.3 (185)                                              | 4.1 (37)                                                |         |
| Smoking during pregnancy (%)    |                                                        |                                                         |         |
| No                              | 69.2 (3,921)                                           | 53.5 (488)                                              |         |
| Yes                             | 11.2 (634)                                             | 17.3 (158)                                              | p<0.001 |
| Missing                         | 19.6 (1,110)                                           | 29.2 (266)                                              |         |
| <b>Paternal characteristics</b> |                                                        |                                                         |         |
| Age (years)                     | 33.5 (5.7)                                             | 30.7 (7.1)                                              | p<0.001 |
| Education (%)                   |                                                        |                                                         |         |
| Primary, or secondary           | 29.0 (1,644)                                           | 21.5 (196)                                              |         |
| Higher                          | 35.7 (2,021)                                           | 9.8 (90)                                                | p<0.001 |
| Missing                         | 35.3 (2,000)                                           | 68.6 (626)                                              |         |
| Ethnicity (%)                   |                                                        |                                                         |         |
| European                        | 59.0 (3,342)                                           | 16.9 (154)                                              |         |
| Non - European                  | 29.3 (1,661)                                           | 46.7 (426)                                              | p<0.001 |
| Missing                         | 11.7 (662)                                             | 36.4 (332)                                              |         |
| Smoking (%)                     |                                                        |                                                         |         |
| No                              | 46.2 (2,617)                                           | 32.1 (293)                                              |         |
| Yes                             | 34.6 (1,960)                                           | 38.2 (348)                                              | p<0.001 |
| Missing                         | 19.2 (1,088)                                           | 29.7 (2,714)                                            |         |
| <b>Child characteristics</b>    |                                                        |                                                         |         |
| Male sex, no (%)                | 50.5 (2,858)                                           | 51.9 (473)                                              | p=0.417 |

|                                              |              |             |         |
|----------------------------------------------|--------------|-------------|---------|
| Gestational age at birth (%)                 |              |             |         |
| <37 weeks                                    | 5.1 (291)    | 6.6 (60)    | p=0.035 |
| ≥37 weeks                                    | 94.4 (5,346) | 92.3 (842)  |         |
| Missing                                      | 0.5 (28)     | 1.1 (10)    |         |
| Birth weight (grams)                         |              |             |         |
|                                              | 3,435 (556)  | 3,319 (525) | p<0.001 |
| Parental history of asthma or atopy (%)      |              |             |         |
| No                                           | 47.8 (2,706) | 44.1 (402)  | p<0.001 |
| Yes                                          | 45.8 (2,597) | 31.7 (289)  |         |
| Missing                                      | 6.4 (362)    | 24.2 (221)  |         |
| Day care attendance 1 <sup>st</sup> year (%) |              |             |         |
| No                                           | 39.2 (2,218) | 1.5 (14)    | p=0.027 |
| Yes                                          | 42.0 (2,380) | 0.5 (5)     |         |
| Missing                                      | 18.8 (1,067) | 97.9 (893)  |         |
| Pet keeping (%)                              |              |             |         |
| No                                           | 53.3 (3,018) | 53.7 (490)  | p<0.001 |
| Yes                                          | 26.8 (1,519) | 16.7 (152)  |         |
| Missing                                      | 19.9 (1,128) | 29.6 (270)  |         |
| Ever eczema (%)                              |              |             |         |
| No                                           | 75.0 (4,247) | 2.1 (19)    | p=0.492 |
| Yes                                          | 23.6 (1,339) | 0.9 (8)     |         |
| Missing                                      | 1.4 (79)     | 97.0 (885)  |         |
| Ever lower respiratory tract infections (%)  |              |             |         |
| No                                           | 76.6 (4,339) | 19.5 (178)  | p<0.001 |
| Yes                                          | 22.8 (1,291) | 2.0 (18)    |         |
| Missing                                      | 0.6 (35)     | 78.5 (716)  |         |
| Breastfeeding ever (%)                       |              |             |         |
| No                                           | 7.3 (416)    | 8.3 (76)    | p=0.018 |
| Yes                                          | 87.4 (4,952) | 72.8 (664)  |         |
| Missing                                      | 5.2 (297)    | 18.9 (172)  |         |
| Duration of breastfeeding (%)                |              |             |         |
| Never                                        | 12.6 (713)   | 27.2 (248)  | p<0.001 |
| 0-3 months                                   | 27.9 (1,580) | 21.1 (192)  |         |
| 3-6 months                                   | 16.3 (923)   | 5.8 (53)    |         |
| >6 months                                    | 24.0 (1,361) | 0.4 (4)     | p<0.001 |
| Missing                                      | 19.2 (1,088) | 45.5 (415)  |         |
| Exclusive breastfeeding (%)                  |              |             |         |
| Never                                        | 7.3 (416)    | 8.3 (76)    | p<0.001 |
| Non-exclusive 4 months                       | 50.8 (2,880) | 32.8 (299)  |         |
| Exclusive 4 months                           | 18.7 (1,057) | 3.7 (34)    |         |
| Missing                                      | 23.2 (1,312) | 55.2 (503)  |         |

---

Values are shown in % (absolute numbers). Differences in parental and child characteristics were evaluated using Student's t- test for continuous variables and chi-squared tests for categorical variables.

**Table S2.** Crude associations of breastfeeding duration and exclusivity with asthma-related symptoms until the age of 4 years.

|                                                  | Odds ratio of wheezing (95% Confidence Interval)            |                                 |                                 |                                 |                                 |                               |                               |                               |                              |                                |                               |                               |
|--------------------------------------------------|-------------------------------------------------------------|---------------------------------|---------------------------------|---------------------------------|---------------------------------|-------------------------------|-------------------------------|-------------------------------|------------------------------|--------------------------------|-------------------------------|-------------------------------|
|                                                  | Age 1 year                                                  |                                 |                                 | Age 2 years                     |                                 |                               | Age 3 years                   |                               |                              | Age 4 years                    |                               |                               |
|                                                  | Ever                                                        | 1-3 times per year              | ≥ 4 times per year              | Ever                            | 1-3 times per year              | ≥ 4 times per year            | Ever                          | 1-3 times per year            | ≥ 4 times per year           | Ever                           | 1-3 times per year            | ≥ 4 times per year            |
| <b>Duration breastfeeding</b><br><b>n=4,280</b>  | n=1,124                                                     | n=858                           | n=266                           | n=740                           | n=605                           | n=135                         | n=422                         | n=334                         | n=88                         | n=425                          | n=345                         | n=80                          |
| Never (n=416)                                    | 1.66**<br>(1.29, 2.14)<br>n=123                             | 1.53**<br>(1.15, 2.03)<br>n=88  | 2.12**<br>(1.39, 3.26)<br>n=35  | 1.47*<br>(1.10, 1.97)<br>n=79   | 1.47*<br>(1.07, 2.02)<br>n=64   | 1.48<br>(0.80, 2.72)<br>n=15  | 1.25<br>(0.87, 1.79)<br>n=45  | 1.19<br>(0.79, 1.78)<br>n=35  | 1.51<br>(0.72, 3.20)<br>n=10 | 1.39<br>(0.98, 1.98)<br>n=49   | 1.34<br>(0.90, 2.00)<br>n=37  | 1.58<br>(0.79, 3.13)<br>n=12  |
| 0-3 months (n=1,580)                             | 1.33**<br>(1.12, 1.57)<br>n=417                             | 1.29**<br>(1.07, 1.56)<br>n=316 | 1.44*<br>(1.06, 1.97)<br>n=101  | 1.37**<br>(1.13, 1.67)<br>n=291 | 1.40**<br>(1.13, 1.73)<br>n=240 | 1.27<br>(0.83, 1.94)<br>n=51  | 1.22<br>(0.95, 1.56)<br>n=160 | 1.15<br>(0.87, 1.51)<br>n=123 | 1.54<br>(0.91, 2.59)<br>n=37 | 1.10<br>(0.86, 1.41)<br>n=156  | 1.17<br>(0.89, 1.54)<br>n=130 | 0.85<br>(0.50, 1.45)<br>n=26  |
| 3-6 months (n=923)                               | 1.23*<br>(1.01, 1.49)<br>n=247                              | 1.23<br>(0.99, 1.51)<br>n=192   | 1.23<br>(0.85, 1.76)<br>n=55    | 1.19<br>(0.95, 1.50)<br>n=164   | 1.20<br>(0.94, 1.54)<br>n=134   | 1.15<br>(0.71, 1.88)<br>n=30  | 0.99<br>(0.74, 1.33)<br>n=86  | 0.98<br>(0.71, 1.34)<br>n=69  | 1.07<br>(0.57, 2.01)<br>n=17 | 1.07<br>(0.71, 1.27)<br>n=86   | 1.03<br>(0.75, 1.41)<br>n=73  | 0.67<br>(0.34, 1.29)<br>n=13  |
| > 6 months (n=1,361)                             | Reference<br>n=337                                          | Reference<br>n=262              | Reference<br>n=75               | Reference<br>n=206              | Reference<br>n=167              | Reference<br>n=39             | Reference<br>n=131            | Reference<br>n=107            | Reference<br>n=24            | Reference<br>n=134             | Reference<br>n=105            | Reference<br>n=29             |
| <i>P for trend</i>                               | <i>p</i> <0.001                                             | <i>p</i> =0.001                 | <i>p</i> =0.001                 | <i>p</i> =0.001                 | <i>p</i> =0.001                 | <i>p</i> =0.158               | <i>p</i> =0.076               | <i>p</i> =0.237               | <i>p</i> =0.089              | <i>p</i> =0.091                | <i>p</i> =0.104               | <i>p</i> =0.548               |
| <b>Exclusive breastfeeding</b><br><b>n=4,353</b> | n=1,124                                                     | n=857                           | n=267                           | n=762                           | n=627                           | n=135                         | n=432                         | n=340                         | n=92                         | n=444                          | n=365                         | n=79                          |
| Never (n=416)                                    | 1.68**<br>(1.29, 2.19)<br>n=123                             | 1.51**<br>(1.12, 2.02)<br>n=88  | 2.38**<br>(1.51, 3.77)<br>n=35  | 1.58**<br>(1.17, 2.15)<br>n=79  | 1.52*<br>(1.09, 2.12)<br>n=64   | 1.93<br>(1.00, 3.73)<br>n=15  | 1.32<br>(0.91, 1.93)<br>n=45  | 1.24<br>(0.82, 1.89)<br>n=35  | 1.71<br>(0.78, 3.78)<br>n=10 | 1.57*<br>(1.08, 2.27)<br>n=49  | 1.42<br>(0.94, 2.14)<br>n=37  | 2.33*<br>(1.09, 4.99)<br>n=12 |
| Non-exclusive until 4 months (n=2,880)           | 1.29**<br>(1.09, 1.53)<br>n=757                             | 1.23*<br>(1.02, 1.47)<br>n=574  | 1.55**<br>(1.12, 2.16)<br>n=183 | 1.43**<br>(1.17, 1.74)<br>n=529 | 1.39**<br>(1.12, 1.72)<br>n=433 | 1.67*<br>(1.06, 2.62)<br>n=96 | 1.22<br>(0.96, 1.55)<br>n=288 | 1.14<br>(0.87, 1.49)<br>n=223 | 1.60<br>(0.93, 2.75)<br>n=65 | 1.28*<br>(1.00, 1.63)<br>n=298 | 1.27<br>(0.98, 1.65)<br>n=247 | 1.33<br>(0.75, 2.34)<br>n=51  |
| Exclusive until 4 months (n=1,057)               | Reference<br>n=244                                          | Reference<br>n=195              | Reference<br>n=49               | Reference<br>n=154              | Reference<br>n=130              | Reference<br>n=24             | Reference<br>n=99             | Reference<br>n=82             | Reference<br>n=17            | Reference<br>n=97              | Reference<br>n=81             | Reference<br>n=16             |
| <i>P for trend</i>                               | <i>p</i> <0.001                                             | <i>p</i> =0.004                 | <i>p</i> <0.001                 | <i>p</i> <0.001                 | <i>p</i> =0.002                 | <i>p</i> =0.021               | <i>p</i> =0.084               | <i>p</i> =0.250               | <i>p</i> =0.100              | <i>p</i> =0.010                | <i>p</i> =0.050               | <i>p</i> =0.043               |
|                                                  | Odds ratio of shortness of breath (95% Confidence Interval) |                                 |                                 |                                 |                                 |                               |                               |                               |                              |                                |                               |                               |
|                                                  | Age 1 year                                                  |                                 |                                 | Age 2 years                     |                                 |                               | Age 3 years                   |                               |                              | Age 4 years                    |                               |                               |
|                                                  | Ever                                                        | 1-3 times per year              | ≥ 4 times per year              | Ever                            | 1-3 times per year              | ≥ 4 times per year            | Ever                          | 1-3 times per year            | ≥ 4 times per year           | Ever                           | 1-3 times per year            | ≥ 4 times per year            |

| <b>Duration breastfeeding<br/>n=4,280</b>  | n=876                          | n=679                         | n=197                           | n=681                         | n=524                         | n=157                          | n=397                         | n=311                         | n=86                         | n=368                         | n=286                         | n=82                          |
|--------------------------------------------|--------------------------------|-------------------------------|---------------------------------|-------------------------------|-------------------------------|--------------------------------|-------------------------------|-------------------------------|------------------------------|-------------------------------|-------------------------------|-------------------------------|
| Never (n=416)                              | 1.46**<br>(1.10, 1.90)<br>n=90 | 1.21<br>(0.89, 1.66)<br>n=62  | 2.50**<br>(1.54, 4.06)<br>n=28  | 1.21<br>(0.90, 1.64)<br>n=70  | 1.01<br>(0.71, 1.44)<br>n=46  | 1.92*<br>(1.15, 3.20)<br>n=24  | 1.14<br>(0.80, 1.64)<br>n=45  | 1.06<br>(0.71, 1.58)<br>n=34  | 1.51<br>(0.74, 3.10)<br>n=11 | 1.38<br>(0.96, 1.99)<br>n=46  | 1.22<br>(0.80, 1.86)<br>n=32  | 1.96*<br>(1.01, 3.79)<br>n=14 |
| 0 -3 months (n=1,580)                      | 1.25*<br>(1.04, 1.50)<br>n=320 | 1.15<br>(0.94, 1.40)<br>n=241 | 1.72**<br>(1.19, 2.48)<br>n=79  | 1.16<br>(0.95, 1.42)<br>n=262 | 1.15<br>(0.92, 1.43)<br>n=203 | 1.21<br>(0.82, 1.80)<br>n=59   | 0.96<br>(0.75, 1.23)<br>n=140 | 0.88<br>(0.67, 1.16)<br>n=105 | 1.30<br>(0.78, 2.17)<br>n=35 | 1.00<br>(0.77, 1.29)<br>n=133 | 0.96<br>(0.72, 1.29)<br>n=101 | 1.12<br>(0.67, 1.88)<br>n=32  |
| 3 -6 months (n=923)                        | 1.23<br>(1.00, 1.52)<br>n=199  | 1.18<br>(0.94, 1.49)<br>n=157 | 1.45<br>(0.94, 2.21)<br>n=42    | 0.91<br>(0.72, 1.15)<br>n=136 | 0.92<br>(0.71, 1.20)<br>n=108 | 0.87<br>(0.54, 1.40)<br>n=28   | 0.73*<br>(0.54, 0.99)<br>n=71 | 0.72<br>(0.52, 1.00)<br>n=57  | 0.78<br>(0.41, 1.51)<br>n=14 | 0.73<br>(0.53, 1.00)<br>n=63  | 0.80<br>(0.57, 1.13)<br>n=54  | 0.49<br>(0.23, 1.04)<br>n=9   |
| > 6 months (n=1,361)                       | Reference<br>n=267             | Reference<br>n=219            | Reference<br>n=48               | Reference<br>n=213            | Reference<br>n=167            | Reference<br>n=46              | Reference<br>n=141            | Reference<br>n=115            | Reference<br>n=26            | Reference<br>n=126            | Reference<br>n=99             | Reference<br>n=27             |
| <i>P for trend</i>                         | <b>p=0.003</b>                 | <b>p=0.141</b>                | <b>p&lt;0.001</b>               | <b>p=0.064</b>                | <b>p=0.337</b>                | <b>p=0.021</b>                 | <b>p=0.631</b>                | <b>p=0.844</b>                | <b>p=0.142</b>               | <b>p=0.188</b>                | <b>p=0.573</b>                | <b>p=0.067</b>                |
| <b>Exclusive breastfeeding<br/>n=4,353</b> | n=866                          | n=674                         | n=192                           | n=692                         | n=540                         | n=152                          | n=401                         | n=311                         | n=90                         | n=378                         | n=289                         | n=89                          |
| Never (n=416)                              | 1.40*<br>(1.05, 1.86)<br>n=90  | 1.11<br>(0.80, 1.53)<br>n=62  | 3.35**<br>(1.93, 5.81)<br>n=28  | 1.35<br>(0.98, 1.84)<br>n=70  | 1.07<br>(0.75, 1.54)<br>n=46  | 2.65**<br>(1.50, 4.67)<br>n=24 | 1.30<br>(0.89, 1.89)<br>n=45  | 1.18<br>(0.77, 1.80)<br>n=34  | 1.88<br>(0.87, 4.07)<br>n=11 | 1.65*<br>(1.13, 2.42)<br>n=46 | 1.52<br>(0.97, 2.37)<br>n=32  | 2.06*<br>(1.03, 4.10)<br>n=14 |
| Non-exclusive until 4 months (n=2,880)     | 1.15<br>(0.96, 1.38)<br>n=576  | 1.01<br>(0.83, 1.23)<br>n=438 | 2.13**<br>(1.39, 3.26)<br>n=138 | 1.22<br>(1.00, 1.49)<br>n=467 | 1.16<br>(0.93, 1.44)<br>n=366 | 1.51<br>(0.98, 2.33)<br>n=101  | 1.04<br>(0.82, 1.33)<br>n=255 | 0.95<br>(0.73, 1.24)<br>n=193 | 1.51<br>(0.88, 2.59)<br>n=62 | 1.18<br>(0.91, 1.53)<br>n=246 | 1.22<br>(0.91, 1.63)<br>n=192 | 1.06<br>(0.64, 1.77)<br>n=54  |
| Exclusive until 4 months (n=1,057)         | Reference<br>n=200             | Reference<br>n=174            | Reference<br>n=26               | Reference<br>n=155            | Reference<br>n=128            | Reference<br>n=27              | Reference<br>n=101            | Reference<br>n=84             | Reference<br>n=17            | Reference<br>n=86             | Reference<br>n=65             | Reference<br>n=21             |
| <i>P for trend</i>                         | <b>p=0.020</b>                 | <b>p=0.632</b>                | <b>p&lt;0.001</b>               | <b>p=0.029</b>                | <b>p=0.368</b>                | <b>p=0.001</b>                 | <b>p=0.254</b>                | <b>p=0.691</b>                | <b>p=0.078</b>               | <b>p=0.016</b>                | <b>p=0.058</b>                | <b>p=0.097</b>                |

**Odds ratio of dry cough (95% Confidence Interval)**

| <b>Duration breastfeeding<br/>n=4,280</b> | <b>Age 1 year</b>          | <b>Age 2 years</b>          | <b>Age 3 years</b>           | <b>Age 4 years</b>         |
|-------------------------------------------|----------------------------|-----------------------------|------------------------------|----------------------------|
|                                           | <b>Ever</b>                | <b>Ever</b>                 | <b>Ever</b>                  | <b>Ever</b>                |
|                                           | n=846                      | n=891                       | n=806                        | n=909                      |
| Never (n=416)                             | 1.22 (0.92, 1.62)<br>n=82  | 1.14 (0.86, 1.52)<br>n=82   | 1.32 (0.98, 1.76)<br>n=79    | 1.07 (0.81, 1.42)<br>n=85  |
| 0-3 months (n=1,580)                      | 1.14 (0.95, 1.37)<br>n=307 | 1.23 (1.03, 1.48)*<br>n=337 | 1.52 (1.25, 1.85)**<br>n=318 | 1.16 (0.97, 1.39)<br>n=350 |

|                         |                            |                            |                              |                            |
|-------------------------|----------------------------|----------------------------|------------------------------|----------------------------|
| 3-6 months<br>(n=923)   | 1.07 (0.86, 1.32)<br>n=183 | 1.23 (1.00, 1.51)<br>n=210 | 1.38 (1.11, 1.72)**<br>n=189 | 0.89 (0.72, 1.10)<br>n=178 |
| > 6 months<br>(n=1,361) | Reference<br>n=274         | Reference<br>n=262         | Reference<br>n=220           | Reference<br>n=296         |
| <i>P for trend</i>      | <b>p=0.091</b>             | <b>p=0.073</b>             | <b>p&lt;0.001</b>            | <b>p=0.132</b>             |

|                                            |                             |                             |                              |                             |
|--------------------------------------------|-----------------------------|-----------------------------|------------------------------|-----------------------------|
| <b>Exclusive breastfeeding<br/>n=4,353</b> | n=842                       | n=910                       | n=846                        | n=937                       |
| Never<br>(n=416)                           | 1.31 (0.97, 1.75)<br>n=82   | 1.13 (0.85, 1.52)<br>n=82   | 1.20 (0.89, 1.62)<br>n=79    | 1.16 (0.87, 1.56)<br>n=85   |
| Non-exclusive until 4 months<br>(n=2,880)  | 1.21 (1.01, 1.46)*<br>n=570 | 1.20 (1.01, 1.44)*<br>n=619 | 1.33 (1.10, 1.60)**<br>n=578 | 1.19 (1.00, 1.43)*<br>n=629 |
| Exclusive until 4 months<br>(n=1,057)      | Reference<br>n=190          | Reference<br>n=209          | Reference<br>n=189           | Reference<br>n=223          |
| <i>P for trend</i>                         | <b>p=0.030</b>              | <b>p=0.135</b>              | <b>p=0.032</b>               | <b>p=0.108</b>              |

**Odds ratio of persistent phlegm (95% Confidence Interval)**

|                                           | Age 1 year                   | Age 2 years                 | Age 3 years                | Age 4 years                  |
|-------------------------------------------|------------------------------|-----------------------------|----------------------------|------------------------------|
|                                           | Ever                         | Ever                        | Ever                       | Ever                         |
| <b>Duration breastfeeding<br/>n=4,280</b> | n=507                        | n=357                       | n=213                      | n=237                        |
| Never<br>(n=416)                          | 1.42 (1.00, 2.01)<br>n=49    | 1.44 (0.97, 2.12)<br>n=39   | 1.83 (1.14, 2.94)*<br>n=28 | 2.54 (1.63, 3.94)**<br>n=36  |
| 0 -3 months<br>(n=1,580)                  | 1.58 (1.26, 1.99)**<br>n=213 | 1.40 (1.07, 1.82)*<br>n=147 | 1.56 (1.10, 2.20)*<br>n=88 | 1.83 (1.31, 2.57)**<br>n=103 |
| 3 -6 months<br>(n=923)                    | 1.19 (0.91, 1.56)<br>n=104   | 1.01 (0.73, 1.39)<br>n=70   | 1.09 (0.72, 1.66)<br>n=41  | 1.19 (0.79, 1.79)<br>n=43    |
| > 6 months<br>(n=1,361)                   | Reference<br>n=141           | Reference<br>n=101          | Reference<br>n=56          | Reference<br>n=55            |
| <i>P for trend</i>                        | <b>p&lt;0.001</b>            | <b>p=0.006</b>              | <b>p=0.002</b>             | <b>p&lt;0.001</b>            |



| <b>Exclusive breastfeeding<br/>n=4,353</b>   | n=509                        | n=365                       | n=229                        | n=251                        |
|----------------------------------------------|------------------------------|-----------------------------|------------------------------|------------------------------|
| Never<br>(n=416)                             | 1.45 (1.01, 2.09)*<br>n=49   | 1.52 (1.01, 2.28)*<br>n=39  | 1.97 (1.20, 3.24)**<br>n=28  | 2.88 (1.80, 4.62)**<br>n=36  |
| Non-exclusive<br>until 4 months<br>(n=2,880) | 1.44 (1.14, 1.83)**<br>n=359 | 1.32 (1.01, 1.72)*<br>n=250 | 1.59 (1.12, 2.26)**<br>n=159 | 1.89 (1.33, 2.70)**<br>n=176 |
| Exclusive<br>until 4 months<br>(n=1,057)     | <i>Reference</i><br>n=101    | <i>Reference</i><br>n=76    | <i>Reference</i><br>n=42     | <i>Reference</i><br>n=39     |
| <i>P for trend</i>                           | <b><i>p=0.006</i></b>        | <b><i>p=0.022</i></b>       | <b><i>p=0.003</i></b>        | <b><i>p&lt;0.001</i></b>     |

Values are odds ratios with 95% confidence intervals from multiple logistic regression models.

\*P < 0.05 and \*\*p < 0.01.

**Table S3.** Non-imputed adjusted associations of breastfeeding duration and exclusivity with asthma-related symptoms until the age of 4 years.

|                                        | Odds ratio of wheezing (95% Confidence Interval)            |                                |                                |                                 |                                 |                               |                               |                               |                              |                                |                               |                              |
|----------------------------------------|-------------------------------------------------------------|--------------------------------|--------------------------------|---------------------------------|---------------------------------|-------------------------------|-------------------------------|-------------------------------|------------------------------|--------------------------------|-------------------------------|------------------------------|
|                                        | Age 1 year                                                  |                                |                                | Age 2 years                     |                                 |                               | Age 3 years                   |                               |                              | Age 4 years                    |                               |                              |
|                                        | Ever                                                        | 1-3 times per year             | ≥ 4 times per year             | Ever                            | 1-3 times per year              | ≥ 4 times per year            | Ever                          | 1-3 times per year            | ≥ 4 times per year           | Ever                           | 1-3 times per year            | ≥ 4 times per year           |
| <b>Duration breastfeeding n=4,280</b>  | n=1,124                                                     | n=858                          | n=266                          | n=740                           | n=605                           | n=135                         | n=422                         | n=334                         | n=88                         | n=425                          | n=345                         | n=80                         |
| Never (n=416)                          | 1.55**<br>(1.18, 2.03)<br>n=123                             | 1.46*<br>(1.08, 1.98)<br>n=88  | 1.78*<br>(1.12, 3.84)<br>n=35  | 1.42*<br>(1.04, 1.95)<br>n=79   | 1.41<br>(1.00, 1.98)<br>n=64    | 1.47<br>(0.75, 2.89)<br>n=15  | 1.17<br>(0.79, 1.73)<br>n=45  | 1.16<br>(0.75, 1.77)<br>n=35  | 1.14<br>(0.47, 2.77)<br>n=10 | 1.54*<br>(1.05, 2.24)<br>n=49  | 1.50<br>(0.99, 2.28)<br>n=37  | 1.44<br>(0.68, 3.06)<br>n=12 |
| 0-3 months (n=1,580)                   | 1.30**<br>(1.08, 1.56)<br>n=417                             | 1.29*<br>(1.06, 1.57)<br>n=316 | 1.34<br>(0.96, 1.88)<br>n=101  | 1.32*<br>(1.07, 1.64)<br>n=291  | 1.34*<br>(1.06, 1.69)<br>n=240  | 1.26<br>(0.79, 2.01)<br>n=51  | 1.10<br>(0.84, 1.44)<br>n=160 | 1.03<br>(0.77, 1.39)<br>n=123 | 1.41<br>(0.79, 2.51)<br>n=37 | 0.97<br>(0.74, 1.28)<br>n=156  | 1.06<br>(0.79, 1.43)<br>n=130 | 0.62<br>(0.34, 1.14)<br>n=26 |
| 3-6 months (n=923)                     | 1.18<br>(0.97, 1.45)<br>n=247                               | 1.20<br>(0.96, 1.50)<br>n=192  | 1.13<br>(0.77, 1.65)<br>n=55   | 1.13<br>(0.95, 1.52)<br>n=164   | 1.20<br>(0.94, 1.58)<br>n=134   | 1.11<br>(0.66, 1.88)<br>n=30  | 0.98<br>(0.73, 1.33)<br>n=86  | 0.97<br>(0.69, 1.35)<br>n=69  | 1.03<br>(0.52, 2.01)<br>n=17 | 0.94<br>(0.70, 1.27)<br>n=86   | 1.01<br>(0.72, 1.40)<br>n=73  | 0.68<br>(0.35, 1.34)<br>n=13 |
| > 6 months (n=1,361)                   | Reference<br>n=337                                          | Reference<br>n=262             | Reference<br>n=75              | Reference<br>n=206              | Reference<br>n=167              | Reference<br>n=39             | Reference<br>n=131            | Reference<br>n=107            | Reference<br>n=24            | Reference<br>n=134             | Reference<br>n=105            | Reference<br>n=29            |
| <i>P for trend</i>                     | <b><i>p</i>&lt;0.001</b>                                    | <b><i>p</i>=0.003</b>          | <b><i>p</i>=0.011</b>          | <b><i>p</i>=0.005</b>           | <b><i>p</i>=0.009</b>           | <b><i>p</i>=0.199</b>         | <b><i>p</i>=0.351</b>         | <b><i>p</i>=0.560</b>         | <b><i>p</i>=0.350</b>        | <b><i>p</i>=0.190</b>          | <b><i>p</i>=0.160</b>         | <b><i>p</i>=0.826</b>        |
| <b>Exclusive breastfeeding n=4,353</b> | n=1,124                                                     | n=857                          | n=267                          | n=762                           | n=627                           | n=135                         | n=432                         | n=340                         | n=92                         | n=444                          | n=365                         | n=79                         |
| Never (n=416)                          | 1.56**<br>(1.18, 2.06)<br>n=123                             | 1.43*<br>(1.05, 1.95)<br>n=88  | 2.00**<br>(1.22, 3.30)<br>n=35 | 1.55**<br>(1.12, 2.14)<br>n=79  | 1.47*<br>(1.04, 2.09)<br>n=64   | 1.99<br>(0.97, 4.08)<br>n=15  | 1.25<br>(0.84, 1.88)<br>n=45  | 1.23<br>(0.79, 1.91)<br>n=35  | 1.29<br>(0.51, 3.26)<br>n=10 | 1.75**<br>(1.18, 2.58)<br>n=49 | 1.59*<br>(1.03, 2.44)<br>n=37 | 2.22<br>(0.97, 5.09)<br>n=12 |
| Non-exclusive until 4 months (n=2,880) | 1.27**<br>(1.06, 1.51)<br>n=757                             | 1.22*<br>(1.01, 1.48)<br>n=574 | 1.48*<br>(1.05, 2.09)<br>n=183 | 1.42**<br>(1.15, 1.75)<br>n=529 | 1.37**<br>(1.09, 1.71)<br>n=433 | 1.73*<br>(1.06, 2.82)<br>n=96 | 1.16<br>(0.90, 1.51)<br>n=288 | 1.08<br>(0.81, 1.43)<br>n=223 | 1.58<br>(0.88, 2.83)<br>n=65 | 1.19<br>(0.92, 1.54)<br>n=298  | 1.17<br>(0.89, 1.55)<br>n=247 | 1.20<br>(0.64, 2.22)<br>n=51 |
| Exclusive until 4 months (n=1,057)     | Reference<br>n=244                                          | Reference<br>n=195             | Reference<br>n=49              | Reference<br>n=154              | Reference<br>n=130              | Reference<br>n=24             | Reference<br>n=99             | Reference<br>n=82             | Reference<br>n=17            | Reference<br>n=97              | Reference<br>n=81             | Reference<br>n=16            |
| <i>P for trend</i>                     | <b><i>p</i>=0.001</b>                                       | <b><i>p</i>=0.012</b>          | <b><i>p</i>=0.004</b>          | <b><i>p</i>=0.001</b>           | <b><i>p</i>=0.007</b>           | <b><i>p</i>=0.025</b>         | <b><i>p</i>=0.203</b>         | <b><i>p</i>=0.372</b>         | <b><i>p</i>=0.305</b>        | <b><i>p</i>=0.009</b>          | <b><i>p</i>=0.046</b>         | <b><i>p</i>=0.093</b>        |
|                                        | Odds ratio of shortness of breath (95% Confidence Interval) |                                |                                |                                 |                                 |                               |                               |                               |                              |                                |                               |                              |
|                                        | Age 1 year                                                  |                                |                                | Age 2 years                     |                                 |                               | Age 3 years                   |                               |                              | Age 4 years                    |                               |                              |
|                                        | Ever                                                        | 1-3 times per year             | ≥ 4 times per year             | Ever                            | 1-3 times per year              | ≥ 4 times per year            | Ever                          | 1-3 times per year            | ≥ 4 times per year           | Ever                           | 1-3 times per year            | ≥ 4 times per year           |

| <b>Duration breastfeeding<br/>n=4,280</b>    | n=876                           | n=679                         | n=197                           | n=681                          | n=524                         | n=157                          | n=397                         | n=311                         | n=86                         | n=368                          | n=286                         | n=82                          |
|----------------------------------------------|---------------------------------|-------------------------------|---------------------------------|--------------------------------|-------------------------------|--------------------------------|-------------------------------|-------------------------------|------------------------------|--------------------------------|-------------------------------|-------------------------------|
| Never<br>(n=416)                             | 1.27<br>(0.94, 1.71)<br>n=90    | 1.07<br>(0.76, 1.51)<br>n=62  | 2.11**<br>(1.23, 3.60)<br>n=28  | 1.17<br>(0.85, 1.62)<br>n=70   | 1.00<br>(0.69, 1.46)<br>n=46  | 1.73<br>(0.98, 3.07)<br>n=24   | 1.09<br>(0.74, 1.61)<br>n=45  | 1.01<br>(0.65, 1.55)<br>n=34  | 1.38<br>(0.61, 3.12)<br>n=11 | 1.43<br>(0.97, 2.10)<br>n=46   | 1.25<br>(0.81, 1.95)<br>n=32  | 2.01<br>(0.99, 4.09)<br>n=14  |
| 0-3 months<br>(n=1,580)                      | 1.31**<br>(1.07, 1.59)<br>n=320 | 1.21<br>(0.98, 1.51)<br>n=241 | 1.73**<br>(1.16, 2.59)<br>n=79  | 1.20<br>(0.97, 1.49)<br>n=262  | 1.18<br>(0.93, 1.50)<br>n=203 | 1.29<br>(0.84, 1.99)<br>n=59   | 0.89<br>(0.68, 1.17)<br>n=140 | 0.82<br>(0.61, 1.11)<br>n=105 | 1.21<br>(0.67, 2.17)<br>n=35 | 0.94<br>(0.71, 1.24)<br>n=133  | 0.91<br>(0.66, 1.24)<br>n=101 | 1.03<br>(0.58, 1.83)<br>n=32  |
| 3-6 months<br>(n=923)                        | 1.23<br>(0.98, 1.53)<br>n=199   | 1.19<br>(0.94, 1.51)<br>n=157 | 1.36<br>(0.86, 2.14)<br>n=42    | 0.90<br>(0.70, 1.16)<br>n=136  | 0.90<br>(0.68, 1.18)<br>n=108 | 0.91<br>(0.55, 1.52)<br>n=28   | 0.73<br>(0.53, 1.00)<br>n=71  | 0.69*<br>(0.49, 0.98)<br>n=57 | 0.89<br>(0.45, 1.77)<br>n=14 | 0.67*<br>(0.48, 0.4)<br>n=63   | 0.71<br>(0.49, 1.02)<br>n=54  | 0.52<br>(0.24, 1.13)<br>n=9   |
| > 6 months<br>(n=1,361)                      | Reference<br>n=267              | Reference<br>n=219            | Reference<br>n=48               | Reference<br>n=213             | Reference<br>n=167            | Reference<br>n=46              | Reference<br>n=141            | Reference<br>n=115            | Reference<br>n=26            | Reference<br>n=126             | Reference<br>n=99             | Reference<br>n=27             |
| <i>P for trend</i>                           | <b>p=0.013</b>                  | <b>p=0.199</b>                | <b>p=0.001</b>                  | <b>p=0.076</b>                 | <b>p=0.314</b>                | <b>p=0.044</b>                 | <b>p=0.963</b>                | <b>p=0.554</b>                | <b>p=0.343</b>               | <b>p=0.246</b>                 | <b>p=0.651</b>                | <b>p=0.113</b>                |
| <b>Exclusive breastfeeding<br/>n=4,353</b>   | n=866                           | n=674                         | n=192                           | n=692                          | n=540                         | n=152                          | n=401                         | n=311                         | n=90                         | n=378                          | n=289                         | n=89                          |
| Never<br>(n=416)                             | 1.26<br>(0.92, 1.72)<br>n=90    | 1.01<br>(0.71, 1.43)<br>n=62  | 2.97**<br>(1.62, 5.43)<br>n=28  | 1.33<br>(0.95, 1.87)<br>n=70   | 1.10<br>(0.75, 1.61)<br>n=46  | 2.34**<br>(1.26, 4.35)<br>n=24 | 1.26<br>(0.84, 1.88)<br>n=45  | 1.15<br>(0.74, 1.79)<br>n=34  | 1.70<br>(0.71, 4.05)<br>n=11 | 1.80**<br>(1.20, 2.70)<br>n=46 | 1.67*<br>(1.04, 2.66)<br>n=32 | 2.12*<br>(1.01, 4.45)<br>n=14 |
| Non-exclusive<br>until 4 months<br>(n=2,880) | 1.24*<br>(1.02, 1.50)<br>n=576  | 1.08<br>(0.88, 1.33)<br>n=438 | 2.31**<br>(1.46, 3.66)<br>n=138 | 1.27*<br>(1.03, 1.58)<br>n=467 | 1.22<br>(0.97, 1.53)<br>n=366 | 1.58<br>(0.99, 2.51)<br>n=101  | 1.02<br>(0.79, 1.32)<br>n=255 | 0.92<br>(0.69, 1.22)<br>n=193 | 1.60<br>(0.88, 2.92)<br>n=62 | 1.20<br>(0.91, 1.58)<br>n=246  | 1.26<br>(0.92, 1.72)<br>n=192 | 1.05<br>(0.60, 1.83)<br>n=54  |
| Exclusive<br>until 4 months<br>(n=1,057)     | Reference<br>n=200              | Reference<br>n=174            | Reference<br>n=26               | Reference<br>n=155             | Reference<br>n=128            | Reference<br>n=27              | Reference<br>n=101            | Reference<br>n=84             | Reference<br>n=17            | Reference<br>n=86              | Reference<br>n=65             | Reference<br>n=21             |
| <i>P for trend</i>                           | <b>p=0.047</b>                  | <b>p=0.707</b>                | <b>p&lt;0.001</b>               | <b>p=0.030</b>                 | <b>p=0.279</b>                | <b>p=0.006</b>                 | <b>p=0.376</b>                | <b>p=0.849</b>                | <b>p=0.146</b>               | <b>p=0.008</b>                 | <b>p=0.031</b>                | <b>p=0.103</b>                |

**Odds ratio of dry cough (95% Confidence Interval)**

|                                           | <b>Age 1 year</b> |                            | <b>Age 2 years</b> |                            | <b>Age 3 years</b> |                              | <b>Age 4 years</b> |                            |
|-------------------------------------------|-------------------|----------------------------|--------------------|----------------------------|--------------------|------------------------------|--------------------|----------------------------|
|                                           | <b>Ever</b>       |                            | <b>Ever</b>        |                            | <b>Ever</b>        |                              | <b>Ever</b>        |                            |
| <b>Duration breastfeeding<br/>n=4,280</b> |                   | n=846                      |                    | n=891                      |                    | n=806                        |                    | n=909                      |
| Never<br>(n=416)                          |                   | 1.28 (0.95, 1.72)<br>n=82  |                    | 1.21 (0.90, 1.63)<br>n=82  |                    | 1.33 (0.96, 1.82)<br>n=79    |                    | 1.13 (0.84, 1.53)<br>n=85  |
| 0-3 months<br>(n=1,580)                   |                   | 1.17 (0.96, 1.43)<br>n=307 |                    | 1.19 (0.97, 1.45)<br>n=337 |                    | 1.42 (1.15, 1.76)**<br>n=318 |                    | 1.14 (0.93, 1.38)<br>n=350 |

|                         |                            |                             |                              |                            |
|-------------------------|----------------------------|-----------------------------|------------------------------|----------------------------|
| 3-6 months<br>(n=923)   | 1.16 (0.93, 1.44)<br>n=183 | 1.26 (1.02, 1.56)*<br>n=210 | 1.43 (1.14, 1.80)**<br>n=189 | 0.93 (0.75, 1.16)<br>n=178 |
| > 6 months<br>(n=1,361) | Reference<br>n=274         | Reference<br>n=262          | Reference<br>n=220           | Reference<br>n=296         |
| <i>P for trend</i>      | <b>p=0.060</b>             | <b>p=0.105</b>              | <b>p=0.005</b>               | <b>p=0.159</b>             |

|                                            |                             |                            |                             |                            |
|--------------------------------------------|-----------------------------|----------------------------|-----------------------------|----------------------------|
| <b>Exclusive breastfeeding<br/>n=4,353</b> | n=842                       | n=910                      | n=846                       | n=937                      |
| Never<br>(n=416)                           | 1.34 (0.98, 1.84)<br>n=82   | 1.18 (0.87, 1.60)<br>n=82  | 1.20 (0.87, 1.64)<br>n=79   | 1.22 (0.90, 1.65)<br>n=85  |
| Non-exclusive until 4 months<br>(n=2,880)  | 1.27 (1.04, 1.54)*<br>n=570 | 1.17 (0.97, 1.41)<br>n=619 | 1.27 (1.05, 1.54)*<br>n=578 | 1.18 (0.98, 1.42)<br>n=629 |
| Exclusive until 4 months<br>(n=1,057)      | Reference<br>n=190          | Reference<br>n=209         | Reference<br>n=189          | Reference<br>n=223         |
| <i>P for trend</i>                         | <b>p=0.018</b>              | <b>p=0.135</b>             | <b>p=0.065</b>              | <b>p=0.091</b>             |

**Odds ratio of persistent phlegm (95% Confidence Interval)**

|                                           | Age 1 year                   | Age 2 years                | Age 3 years               | Age 4 years                 |
|-------------------------------------------|------------------------------|----------------------------|---------------------------|-----------------------------|
|                                           | Ever                         | Ever                       | Ever                      | Ever                        |
| <b>Duration breastfeeding<br/>n=4,280</b> | n=507                        | n=357                      | n=213                     | n=237                       |
| Never<br>(n=416)                          | 1.61 (1.10, 2.35) *<br>n=49  | 1.36 (0.89, 2.06)<br>n=39  | 1.38 (0.82, 2.33)<br>n=28 | 2.78 (1.75, 4.43)**<br>n=36 |
| 0 -3 months<br>(n=1,580)                  | 1.58 (1.23, 2.03)**<br>n=213 | 1.16 (0.86, 1.55)<br>n=147 | 1.17 (0.80, 1.71)<br>n=88 | 1.55 (1.07, 2.26)*<br>n=103 |
| 3 -6 months<br>(n=923)                    | 1.29 (0.96, 1.72)<br>n=104   | 1.04 (0.74, 1.45)<br>n=70  | 0.96 (0.61, 1.49)<br>n=41 | 1.20 (0.78, 1.85)<br>n=43   |
| > 6 months<br>(n=1,361)                   | Reference<br>n=141           | Reference<br>n=101         | Reference<br>n=56         | Reference<br>n=55           |
| <i>P for trend</i>                        | <b>p&lt;0.001</b>            | <b>p=0.140</b>             | <b>p=0.185</b>            | <b>p&lt;0.001</b>           |

| <b>Exclusive breastfeeding<br/>n=4,353</b>   | n=509                       | n=365                      | n=229                      | n=251                        |
|----------------------------------------------|-----------------------------|----------------------------|----------------------------|------------------------------|
| Never<br>(n=416)                             | 1.49 (1.01, 2.21)*<br>n=49  | 1.36 (0.88, 2.10)<br>n=39  | 1.56 (0.90, 2.70)<br>n=28  | 3.01 (1.83, 4.95)**<br>n=36  |
| Non-exclusive<br>until 4 months<br>(n=2,880) | 1.35 (1.05, 1.74)*<br>n=359 | 1.14 (0.86, 1.52)<br>n=250 | 1.34 (0.92, 1.96)<br>n=159 | 1.68 (1.15, 2.46)**<br>n=176 |
| Exclusive<br>until 4 months<br>(n=1,057)     | <i>Reference</i><br>n=101   | <i>Reference</i><br>n=76   | <i>Reference</i><br>n=42   | <i>Reference</i><br>n=39     |
| <i>P for trend</i>                           | <b><i>p=0.016</i></b>       | <b><i>p=0.162</i></b>      | <b><i>p=0.081</i></b>      | <b><i>p&lt;0.001</i></b>     |

Values are odds ratios with 95% confidence intervals from multiple logistic regression models.

\*P < 0.05 and \*\*p < 0.01. Models are adjusted for parental age, education, ethnicity, smoking habits, maternal parity, children's sex, gestational age, birth weight, parental history of asthma or atopy, daycare attendance and pet keeping missing values were treated as a separate category.

**Table S4.** Imputed and adjusted associations of breastfeeding duration and exclusivity with frequencies of wheezing and shortness of breath until the age of 4 years.

|                                            | Odds ratio of wheezing (95% Confidence Interval)            |                                |                                |                                 |                                |                               |                               |                               |                              |                               |                               |                              |
|--------------------------------------------|-------------------------------------------------------------|--------------------------------|--------------------------------|---------------------------------|--------------------------------|-------------------------------|-------------------------------|-------------------------------|------------------------------|-------------------------------|-------------------------------|------------------------------|
|                                            | Age 1 year                                                  |                                |                                | Age 2 years                     |                                |                               | Age 3 years                   |                               |                              | Age 4 years                   |                               |                              |
|                                            | Ever                                                        | 1-3 times per year             | ≥ 4 times per year             | Ever                            | 1-3 times per year             | ≥ 4 times per year            | Ever                          | 1-3 times per year            | ≥ 4 times per year           | Ever                          | 1-3 times per year            | ≥ 4 times per year           |
| <b>Duration breastfeeding<br/>n=4,280</b>  | n=1,124                                                     | n=858                          | n=266                          | n=740                           | n=605                          | n=135                         | n=422                         | n=334                         | n=88                         | n=425                         | n=345                         | n=80                         |
| Never (n=416)                              | 1.68**<br>(1.28, 2.19)<br>n=123                             | 1.59**<br>(1.18, 2.13)<br>n=88 | 1.93**<br>(1.23, 3.03)<br>n=35 | 1.37*<br>(1.01, 1.85)<br>n=79   | 1.36<br>(0.97, 1.89)<br>n=64   | 1.45<br>(0.77, 2.73)<br>n=15  | 1.12<br>(0.76, 1.62)<br>n=45  | 1.05<br>(0.69, 1.59)<br>n=35  | 1.39<br>(0.64, 3.03)<br>n=10 | 1.28<br>(0.88, 1.84)<br>n=49  | 1.25<br>(0.82, 1.88)<br>n=37  | 1.32<br>(0.64, 2.71)<br>n=12 |
| 0-3 months (n=1,580)                       | 1.28**<br>(1.07, 1.53)<br>n=417                             | 1.27*<br>(1.04, 1.54)<br>n=316 | 1.38<br>(0.99, 1.91)<br>n=101  | 1.28*<br>(1.04, 1.58)<br>n=291  | 1.30*<br>(1.04, 1.62)<br>n=240 | 1.23<br>(0.79, 1.91)<br>n=51  | 1.12<br>(0.86, 1.45)<br>n=160 | 1.04<br>(0.78, 1.38)<br>n=123 | 1.51<br>(0.87, 2.58)<br>n=37 | 1.02<br>(0.78, 1.31)<br>n=156 | 1.10<br>(0.82, 1.46)<br>n=130 | 0.75<br>(0.43, 1.31)<br>n=26 |
| 3-6 months (n=923)                         | 1.19<br>(0.97, 1.44)<br>n=247                               | 1.20<br>(0.96, 1.49)<br>n=192  | 1.15<br>(0.80, 1.67)<br>n=55   | 1.17<br>(0.93, 1.47)<br>n=164   | 1.17<br>(0.91, 1.50)<br>n=134  | 1.15<br>(0.70, 1.88)<br>n=30  | 1.00<br>(0.75, 1.33)<br>n=86  | 0.98<br>(0.71, 1.34)<br>n=69  | 1.10<br>(0.58, 2.06)<br>n=17 | 0.98<br>(0.73, 1.31)<br>n=86  | 1.07<br>(0.78, 1.47)<br>n=73  | 0.66<br>(0.34, 1.29)<br>n=13 |
| > 6 months (n=1,361)                       | Reference<br>n=337                                          | Reference<br>n=262             | Reference<br>n=75              | Reference<br>n=206              | Reference<br>n=167             | Reference<br>n=39             | Reference<br>n=131            | Reference<br>n=107            | Reference<br>n=24            | Reference<br>n=134            | Reference<br>n=105            | Reference<br>n=29            |
| <i>P for trend</i>                         | <i>p</i> <0.001                                             | <i>p</i> =0.001                | <i>p</i> =0.004                | <i>p</i> =0.010                 | <i>p</i> =0.016                | <i>p</i> =0.222               | <i>p</i> =0.371               | <i>p</i> =0.758               | <i>p</i> =0.159              | <i>p</i> =0.376               | <i>p</i> =0.321               | <i>p</i> =0.978              |
| <b>Exclusive breastfeeding<br/>n=4,353</b> | n=1,124                                                     | n=857                          | n=267                          | n=762                           | n=627                          | n=135                         | n=432                         | n=340                         | n=92                         | n=444                         | n=365                         | n=79                         |
| Never (n=416)                              | 1.68**<br>(1.27, 2.22)<br>n=123                             | 1.54**<br>(1.13, 2.10)<br>n=88 | 2.22**<br>(1.36, 3.60)<br>n=35 | 1.43*<br>(1.04, 1.95)<br>n=79   | 1.35<br>(0.96, 1.90)<br>n=64   | 1.91<br>(0.96, 3.79)<br>n=15  | 1.18<br>(0.79, 1.74)<br>n=45  | 1.10<br>(0.71, 1.70)<br>n=35  | 1.53<br>(0.67, 3.49)<br>n=10 | 1.40<br>(0.95, 2.05)<br>n=49  | 1.27<br>(0.83, 1.95)<br>n=37  | 1.96<br>(0.88, 4.33)<br>n=12 |
| Non-exclusive until 4 months (n=2,880)     | 1.22*<br>(1.02, 1.45)<br>n=757                              | 1.17<br>(0.96, 1.41)<br>n=574  | 1.50*<br>(1.07, 2.10)<br>n=183 | 1.32**<br>(1.08, 1.62)<br>n=529 | 1.27*<br>(1.02, 1.58)<br>n=433 | 1.61*<br>(1.01, 2.56)<br>n=96 | 1.12<br>(0.87, 1.44)<br>n=288 | 1.04<br>(0.79, 1.36)<br>n=223 | 1.55<br>(0.89, 2.70)<br>n=65 | 1.18<br>(0.92, 1.52)<br>n=298 | 1.17<br>(0.89, 1.54)<br>n=247 | 1.21<br>(0.67, 2.16)<br>n=51 |
| Exclusive until 4 months (n=1,057)         | Reference<br>n=244                                          | Reference<br>n=195             | Reference<br>n=49              | Reference<br>n=154              | Reference<br>n=130             | Reference<br>n=24             | Reference<br>n=99             | Reference<br>n=82             | Reference<br>n=17            | Reference<br>n=97             | Reference<br>n=81             | Reference<br>n=16            |
| <i>P for trend</i>                         | <i>p</i> <0.001                                             | <i>p</i> =0.008                | <i>p</i> =0.001                | <i>p</i> =0.007                 | <i>p</i> =0.033                | <i>p</i> =0.033               | <i>p</i> =0.334               | <i>p</i> =0.667               | <i>p</i> =0.186              | <i>p</i> =0.075               | <i>p</i> =0.201               | <i>p</i> =0.127              |
|                                            | Odds ratio of shortness of breath (95% Confidence Interval) |                                |                                |                                 |                                |                               |                               |                               |                              |                               |                               |                              |
|                                            | Age 1 year                                                  |                                |                                | Age 2 years                     |                                |                               | Age 3 years                   |                               |                              | Age 4 years                   |                               |                              |
|                                            | Ever                                                        | 1-3 times per year             | ≥ 4 times per year             | Ever                            | 1-3 times per year             | ≥ 4 times per year            | Ever                          | 1-3 times per year            | ≥ 4 times per year           | Ever                          | 1-3 times per year            | ≥ 4 times per year           |

|                                              |                                 |                               |                                 |                               |                               |                                |                               |                               |                              |                               |                               |                              |
|----------------------------------------------|---------------------------------|-------------------------------|---------------------------------|-------------------------------|-------------------------------|--------------------------------|-------------------------------|-------------------------------|------------------------------|-------------------------------|-------------------------------|------------------------------|
| <b>Duration breastfeeding<br/>n=4,280</b>    | n=876                           | n=679                         | n=197                           | n=681                         | n=524                         | n=157                          | n=397                         | n=311                         | n=86                         | n=368                         | n=286                         | n=82                         |
| Never<br>(n=416)                             | 1.44*<br>(1.08, 1.92)<br>n=90   | 1.27<br>(0.92, 1.76)<br>n=62  | 2.11**<br>(1.26, 3.50)<br>n=28  | 1.13<br>(0.82, 1.54)<br>n=70  | 0.97<br>(0.67, 1.40)<br>n=46  | 1.69<br>(0.99, 2.87)<br>n=24   | 1.00<br>(0.69, 1.45)<br>n=45  | 0.95<br>(0.62, 1.43)<br>n=34  | 1.26<br>(0.59, 2.66)<br>n=11 | 1.15<br>(0.78, 1.68)<br>n=46  | 1.07<br>(0.69, 1.65)<br>n=32  | 1.44<br>(0.72, 2.90)<br>n=14 |
| 0-3 months<br>(n=1,580)                      | 1.31**<br>(1.08, 1.58)<br>n=320 | 1.23<br>(1.00, 1.52)<br>n=241 | 1.67*<br>(1.13, 2.45)<br>n=79   | 1.15<br>(0.93, 1.41)<br>n=262 | 1.16<br>(0.92, 1.47)<br>n=203 | 1.10<br>(0.73, 1.66)<br>n=59   | 0.90<br>(0.70, 1.17)<br>n=140 | 0.84<br>(0.63, 1.12)<br>n=105 | 1.20<br>(0.70, 2.05)<br>n=35 | 0.90<br>(0.69, 1.18)<br>n=133 | 0.90<br>(0.66, 1.21)<br>n=101 | 0.93<br>(0.54, 1.59)<br>n=32 |
| 3-6 months<br>(n=923)                        | 1.23<br>(0.99, 1.52)<br>n=199   | 1.19<br>(0.94, 1.50)<br>n=157 | 1.37<br>(0.89, 2.11)<br>n=42    | 0.89<br>(0.70, 1.12)<br>n=136 | 0.90<br>(0.69, 1.18)<br>n=108 | 0.84<br>(0.52, 1.36)<br>n=28   | 0.75<br>(0.55, 1.01)<br>n=71  | 0.73<br>(0.52, 1.02)<br>n=57  | 0.83<br>(0.43, 1.61)<br>n=14 | 0.72*<br>(0.52, 0.99)<br>n=63 | 0.79<br>(0.56, 1.12)<br>n=54  | 0.49<br>(0.23, 1.05)<br>n=9  |
| > 6 months<br>(n=1,361)                      | Reference<br>n=267              | Reference<br>n=219            | Reference<br>n=48               | Reference<br>n=213            | Reference<br>n=167            | Reference<br>n=46              | Reference<br>n=141            | Reference<br>n=115            | Reference<br>n=26            | Reference<br>n=126            | Reference<br>n=99             | Reference<br>n=27            |
| <i>P for trend</i>                           | <b>p=0.002</b>                  | <b>p=0.045</b>                | <b>p=0.001</b>                  | <b>p=0.169</b>                | <b>p=0.415</b>                | <b>p=0.104</b>                 | <b>p=0.772</b>                | <b>p=0.452</b>                | <b>p=0.387</b>               | <b>p=0.837</b>                | <b>p=0.905</b>                | <b>p=0.428</b>               |
| <b>Exclusive breastfeeding<br/>n=4,353</b>   | n=866                           | n=674                         | n=192                           | n=692                         | n=540                         | n=152                          | n=401                         | n=311                         | n=90                         | n=378                         | n=289                         | n=89                         |
| Never<br>(n=416)                             | 1.38*<br>(1.02, 1.86)<br>n=90   | 1.15<br>(0.82, 1.61)<br>n=62  | 2.82**<br>(1.58, 5.00)<br>n=28  | 1.23<br>(0.89, 1.71)<br>n=70  | 1.00<br>(0.69, 1.46)<br>n=46  | 2.31**<br>(1.28, 4.17)<br>n=24 | 1.14<br>(0.77, 1.69)<br>n=45  | 1.07<br>(0.69, 1.66)<br>n=34  | 1.52<br>(0.68, 3.38)<br>n=11 | 1.38<br>(0.93, 2.06)<br>n=46  | 1.34<br>(0.84, 2.12)<br>n=32  | 1.51<br>(0.73, 3.12)<br>n=14 |
| Non-exclusive<br>until 4 months<br>(n=2,880) | 1.18<br>(0.98, 1.43)<br>n=576   | 1.05<br>(0.86, 1.28)<br>n=438 | 2.14**<br>(1.38, 3.31)<br>n=138 | 1.19<br>(0.97, 1.46)<br>n=467 | 1.14<br>(0.91, 1.43)<br>n=366 | 1.42<br>(0.91, 2.22)<br>n=101  | 1.02<br>(0.79, 1.31)<br>n=255 | 0.93<br>(0.71, 1.23)<br>n=193 | 1.46<br>(0.83, 2.54)<br>n=62 | 1.11<br>(0.85, 1.44)<br>n=246 | 1.17<br>(0.87, 1.58)<br>n=192 | 0.93<br>(0.55, 1.57)<br>n=54 |
| Exclusive<br>until 4 months<br>(n=1,057)     | Reference<br>n=200              | Reference<br>n=174            | Reference<br>n=26               | Reference<br>n=155            | Reference<br>n=128            | Reference<br>n=27              | Reference<br>n=101            | Reference<br>n=84             | Reference<br>n=17            | Reference<br>n=86             | Reference<br>n=65             | Reference<br>n=21            |
| <i>P for trend</i>                           | <b>p=0.023</b>                  | <b>p=0.426</b>                | <b>p&lt;0.001</b>               | <b>p=0.112</b>                | <b>p=0.600</b>                | <b>p=0.007</b>                 | <b>p=0.579</b>                | <b>p=0.975</b>                | <b>p=0.223</b>               | <b>p=0.135</b>                | <b>p=0.182</b>                | <b>p=0.406</b>               |

**Odds ratio of dry cough (95% Confidence Interval)**

|                                           | Age 1 year                 |  | Age 2 years                 |  | Age 3 years                  |  | Age 4 years                |  |
|-------------------------------------------|----------------------------|--|-----------------------------|--|------------------------------|--|----------------------------|--|
|                                           | Ever                       |  | Ever                        |  | Ever                         |  | Ever                       |  |
| <b>Duration Breastfeeding<br/>n=4,280</b> | n=846                      |  | n=891                       |  | n=806                        |  | n=909                      |  |
| Never<br>(n=416)                          | 1.41 (1.05, 1.90)*<br>n=82 |  | 1.27 (0.95, 1.70)<br>n=82   |  | 1.35 (1.00, 1.82)<br>n=79    |  | 1.06 (0.79, 1.42)<br>n=85  |  |
| 0-3 months<br>(n=1,580)                   | 1.16 (0.95, 1.41)<br>n=307 |  | 1.23 (1.01, 1.48)*<br>n=337 |  | 1.52 (1.24, 1.85)**<br>n=318 |  | 1.13 (0.93, 1.36)<br>n=350 |  |

|                         |                            |                            |                              |                            |
|-------------------------|----------------------------|----------------------------|------------------------------|----------------------------|
| 3-6 months<br>(n=923)   | 1.00 (0.81, 1.24)<br>n=183 | 1.20 (0.97, 1.47)<br>n=210 | 1.39 (1.11, 1.74)**<br>n=189 | 0.90 (0.72, 1.11)<br>n=178 |
| > 6 months<br>(n=1,361) | <i>Reference</i><br>n=274  | <i>Reference</i><br>n=262  | <i>Reference</i><br>n=220    | <i>Reference</i><br>n=296  |
| <i>P for trend</i>      | <b>p=0.020</b>             | <b>p=0.033</b>             | <b>p=0.001</b>               | <b>p=0.249</b>             |

|                                            |                             |                            |                              |                            |
|--------------------------------------------|-----------------------------|----------------------------|------------------------------|----------------------------|
| <b>Exclusive breastfeeding<br/>n=4,353</b> | n=842                       | n=910                      | n=846                        | n=937                      |
| Never<br>(n=416)                           | 1.52 (1.11, 2.07)**<br>n=82 | 1.24 (0.92, 1.68)<br>n=82  | 1.18 (0.86, 1.60)<br>n=79    | 1.14 (0.84, 1.54)<br>n=85  |
| Non-exclusive until 4 months<br>(n=2,880)  | 1.22 (1.01, 1.47)*<br>n=570 | 1.19 (0.99, 1.43)<br>n=619 | 1.30 (1.07, 1.57)**<br>n=578 | 1.17 (0.97, 1.40)<br>n=629 |
| Exclusive until 4 months<br>(n=1,057)      | <i>Reference</i><br>n=190   | <i>Reference</i><br>n=209  | <i>Reference</i><br>n=189    | <i>Reference</i><br>n=223  |
| <i>P for trend</i>                         | <b>p=0.005</b>              | <b>p=0.070</b>             | <b>p=0.061</b>               | <b>p=0.174</b>             |

**Odds ratio of persistent phlegm (95% Confidence Interval)**

|                                           | <b>Age 1 year</b>            | <b>Age 2 years</b>         | <b>Age 3 years</b>         | <b>Age 4 years</b>          |
|-------------------------------------------|------------------------------|----------------------------|----------------------------|-----------------------------|
|                                           | <b>Ever</b>                  | <b>Ever</b>                | <b>Ever</b>                | <b>Ever</b>                 |
| <b>Duration breastfeeding<br/>n=4,280</b> | n=507                        | n=357                      | n=213                      | n=237                       |
| Never<br>(n=416)                          | 1.43 (0.99, 2.05)<br>n=49    | 1.33 (0.88, 1.99)<br>n=39  | 1.83 (1.11, 3.01)*<br>n=28 | 2.52 (1.58, 4.01)**<br>n=36 |
| 0 -3 months<br>(n=1,580)                  | 1.43 (1.12, 1.81)**<br>n=213 | 1.17 (0.89, 1.55)<br>n=147 | 1.30 (0.90, 1.86)<br>n=88  | 1.56 (1.09, 2.21)*<br>n=103 |
| 3 -6 months<br>(n=923)                    | 1.19 (0.90, 1.57)<br>n=104   | 1.01 (0.73, 1.40)<br>n=70  | 1.14 (0.75, 1.74)<br>n=41  | 1.23 (0.81, 1.87)<br>n=43   |
| > 6 months<br>(n=1,361)                   | <i>Reference</i><br>n=141    | <i>Reference</i><br>n=101  | <i>Reference</i><br>n=56   | <i>Reference</i><br>n=55    |
| <i>P for trend</i>                        | <b>p=0.003</b>               | <b>p=0.120</b>             | <b>p=0.024</b>             | <b>p&lt;0.001</b>           |



| <b>Exclusive breastfeeding<br/>n=4,353</b>   | n=509                      | n=365                      | n=229                      | n=251                       |
|----------------------------------------------|----------------------------|----------------------------|----------------------------|-----------------------------|
| Never<br>(n=416)                             | 1.36 (0.93, 1.98)<br>n=49  | 1.30 (0.85, 1.98)<br>N=39  | 1.79 (1.06, 3.02)*<br>n=28 | 2.61 (1.59, 4.26)**<br>n=36 |
| Non-exclusive<br>until 4 months<br>(n=2,880) | 1.23 (0.96, 1.56)<br>n=359 | 1.10 (0.83, 1.45)<br>n=250 | 1.25 (0.87, 1.79)<br>n=159 | 1.60 (1.11, 2.29)*<br>n=176 |
| Exclusive<br>until 4 months<br>(n=1,057)     | <i>Reference</i><br>n=101  | <i>Reference</i><br>n=76   | <i>Reference</i><br>n=42   | <i>Reference</i><br>n=39    |
| <i>P for trend</i>                           | <b><i>p=0.067</i></b>      | <b><i>p=0.246</i></b>      | <b><i>p=0.035</i></b>      | <b><i>p&lt;0.001</i></b>    |

Values are odds ratios with 95% confidence intervals from multiple logistic regression models.

\*P < 0.05 and \*\*p < 0.01. Models are adjusted for parental age, education, ethnicity, smoking habits, maternal parity, children's sex, gestational age, birth weight, parental history of asthma or atopy, daycare attendance and pet keeping.

**Table S5.** Associations of breastfeeding duration and exclusivity with asthma-related symptoms until the age of 4 years by GEE models

|                                           | Odds ratio of wheezing (95% Confidence Interval)            |                       |                       |                       |                          |
|-------------------------------------------|-------------------------------------------------------------|-----------------------|-----------------------|-----------------------|--------------------------|
|                                           | Age 1 year                                                  | Age 2 years           | Age 3 years           | Age 4 years           | Overall                  |
| <b>Duration breastfeeding</b><br>n=4,280  |                                                             |                       |                       |                       |                          |
| Never (n=416)                             | 1.62 (1.24, 2.13)**                                         | 1.34 (1.02, 1.78)*    | 1.34 (0.93, 1.73)     | 1.26 (0.91, 1.76)     | 1.44 (1.24, 1.66)**      |
| 0-3 months (n=1,580)                      | 1.30 (1.10, 1.53) **                                        | 1.25 (1.04, 1.52)*    | 1.25 (0.99, 1.58)     | 1.07 (0.85, 1.34)     | 1.23 (1.12, 1.36)**      |
| 3-6 months (n=923)                        | 1.24 (1.02, 1.51)*                                          | 1.11 (0.89, 1.39)     | 1.01 (0.76, 1.34)     | 0.96 (0.71, 1.30)     | 1.12 (0.99, 1.26)        |
| > 6 months (n=1,361)                      | <i>Reference</i>                                            | <i>Reference</i>      | <i>Reference</i>      | <i>Reference</i>      | <i>Reference</i>         |
| <i>P for trend</i>                        | <b><i>p&lt;0.001</i></b>                                    | <b><i>p=0.005</i></b> | <b><i>p=0.023</i></b> | <b><i>p=0.149</i></b> | <b><i>p&lt;0.001</i></b> |
| <b>Exclusive breastfeeding</b><br>n=4,353 |                                                             |                       |                       |                       |                          |
| Never (n=416)                             | 1.50 (1.13, 1.98)**                                         | 1.44 (1.07, 1.95)*    | 1.41 (0.99, 2.01)     | 1.39 (0.98, 1.98)     | 1.45 (1.24, 1.69)**      |
| Non-exclusive until 4 months (n=2,880)    | 1.15 (0.97, 1.36)                                           | 1.31 (1.08, 1.58)**   | 1.23 (0.98, 1.55)     | 1.20 (0.94, 1.54)     | 1.21 (1.09, 1.34)**      |
| Exclusive until 4 months (n=1,057)        | <i>Reference</i>                                            | <i>Reference</i>      | <i>Reference</i>      | <i>Reference</i>      | <i>Reference</i>         |
| <i>P for trend</i>                        | <b><i>p=0.005</i></b>                                       | <b><i>p=0.005</i></b> | <b><i>p=0.031</i></b> | <b><i>p=0.055</i></b> | <b><i>p&lt;0.001</i></b> |
|                                           | Odds ratio of shortness of breath (95% Confidence Interval) |                       |                       |                       |                          |
|                                           | Age 1 year                                                  | Age 2 years           | Age 3 years           | Age 4 years           | Overall                  |
| <b>Duration breastfeeding</b><br>n=4,280  |                                                             |                       |                       |                       |                          |
| Never (n=416)                             | 1.38 (1.05, 1.80)*                                          | 1.15 (0.87, 1.52)     | 1.17 (0.75, 1.81)     | 1.24 (0.81, 1.92)     | 1.26 (1.07, 1.48)**      |
| 0 -3 months (n=1,580)                     | 1.26 (1.05, 1.51)*                                          | 1.15 (0.94, 1.40)     | 1.08 (0.86, 1.35)     | 1.02 (0.76, 1.36)     | 1.15 (1.03, 1.29)*       |
| 3 -6 months (n=923)                       | 1.25 (1.02, 1.54)*                                          | 0.92 (0.72, 1.17)     | 0.77 (0.59, 1.01)     | 0.80 (0.59, 1.09)     | 0.99 (0.88, 1.13)        |
| > 6 months (n=1,361)                      | <i>Reference</i>                                            | <i>Reference</i>      | <i>Reference</i>      | <i>Reference</i>      | <i>Reference</i>         |

| <i>P for trend</i>                                            | <b><i>p=0.008</i></b> | <b><i>p=0.107</i></b> | <b><i>p=0.259</i></b> | <b><i>p=0.366</i></b> | <b><i>p=0.001</i></b>    |
|---------------------------------------------------------------|-----------------------|-----------------------|-----------------------|-----------------------|--------------------------|
| <b>Exclusive breastfeeding<br/>n=4,353</b>                    |                       |                       |                       |                       |                          |
| Never<br>(n=416)                                              | 1.26 (0.96, 1.66)     | 1.26 (0.94, 1.68)     | 1.32 (0.87, 2.01)     | 1.40 (0.94, 2.09)     | 1.30 (1.10, 1.53)**      |
| Non-exclusive until 4 months<br>(n=2,880)                     | 1.11 (0.93, 1.33)     | 1.19 (0.98, 1.45)     | 1.14 (0.90, 1.43)     | 1.15 (0.88, 1.50)     | 1.14 (1.02, 1.28)*       |
| Exclusive until 4 months<br>(n=1,057)                         | <i>Reference</i>      | <i>Reference</i>      | <i>Reference</i>      | <i>Reference</i>      | <i>Reference</i>         |
| <i>P for trend</i>                                            | <b><i>p=0.085</i></b> | <b><i>p=0.067</i></b> | <b><i>p=0.136</i></b> | <b><i>p=0.097</i></b> | <b><i>p=0.001</i></b>    |
| <b>Odds ratio of dry cough (95% Confidence Interval)</b>      |                       |                       |                       |                       |                          |
|                                                               | <b>Age 1 year</b>     | <b>Age 2 years</b>    | <b>Age 3 years</b>    | <b>Age 4 years</b>    | <b>Overall</b>           |
| <b>Duration breastfeeding<br/>n=4,280</b>                     |                       |                       |                       |                       |                          |
| Never<br>(n=416)                                              | 1.30 (0.99, 1.72)     | 1.19 (0.86, 1.64)     | 1.40 (1.01, 1.95)*    | 11.13 (0.83, 1.55)    | 1.25 (1.08, 1.44)**      |
| 0-3 months<br>(n=1,580)                                       | 1.14 (0.94, 1.37)     | 1.17 (0.96, 1.42)     | 1.42 (1.17, 1.71)**   | 1.14 (0.96, 1.36)     | 1.20 (1.10, 1.32)**      |
| 3-6 months<br>(n=923)                                         | 1.06 (0.86, 1.30)     | 1.18 (0.96, 1.45)     | 1.31 (1.06, 1.63)*    | 0.92 (0.74, 1.14)     | 1.10 (0.99, 1.22)        |
| > 6 months<br>(n=1,361)                                       | <i>Reference</i>      | <i>Reference</i>      | <i>Reference</i>      | <i>Reference</i>      | <i>Reference</i>         |
| <i>P for trend</i>                                            | <b><i>p=0.052</i></b> | <b><i>p=0.158</i></b> | <b><i>p=0.003</i></b> | <b><i>p=0.119</i></b> | <b><i>p&lt;0.001</i></b> |
| <b>Exclusive breastfeeding<br/>n=4,353</b>                    |                       |                       |                       |                       |                          |
| Never<br>(n=416)                                              | 1.33 (0.99, 1.78)     | 1.20 (0.86, 1.68)     | 1.31 (0.97, 1.77)     | 1.22 (0.88, 1.69)     | 1.26 (1.09, 1.46)**      |
| Non-exclusive until 4 months<br>(n=2,880)                     | 1.16 (0.96, 1.39)     | 1.18 (0.98, 1.42)     | 1.28 (1.03, 1.58)*    | 1.20 (1.01, 1.41)*    | 1.20 (1.10, 1.31)**      |
| Exclusive until 4 months<br>(n=1,057)                         | <i>Reference</i>      | <i>Reference</i>      | <i>Reference</i>      | <i>Reference</i>      | <i>Reference</i>         |
| <i>P for trend</i>                                            | <b><i>p=0.045</i></b> | <b><i>p=0.146</i></b> | <b><i>p=0.019</i></b> | <b><i>p=0.092</i></b> | <b><i>p&lt;0.001</i></b> |
| <b>Odds ratio persistent phlegm (95% Confidence Interval)</b> |                       |                       |                       |                       |                          |
|                                                               | <b>Age 1 year</b>     | <b>Age 2 years</b>    | <b>Age 3 years</b>    | <b>Age 4 years</b>    | <b>Overall</b>           |

| <b>Duration breastfeeding</b>             |                       |                       |                       |                          |                          |
|-------------------------------------------|-----------------------|-----------------------|-----------------------|--------------------------|--------------------------|
| <b>n=4,280</b>                            |                       |                       |                       |                          |                          |
| Never<br>(n=416)                          | 1.38 (0.99, 1.92)     | 1.36 (0.93, 1.99)     | 1.71 (1.06, 2.75)*    | 2.14 (1.41, 3.25)**      | 1.57 (1.29, 1.91)**      |
| 0 -3 months<br>(n=1,580)                  | 1.39 (1.11, 1.74)**   | 1.15 (0.88, 1.50)     | 1.25 (0.90, 1.73)     | 1.41 (1.02, 1.95)*       | 1.31, 1.14, 1.51)**      |
| 3 -6 months<br>(n=923)                    | 1.26 (0.96, 1.66)     | 1.05 (0.76, 1.45)     | 1.08 (0.73, 1.59)     | 1.14 (0.76, 1.73)        | 1.16 (0.97, 1.38)        |
| > 6 months<br>(n=1,361)                   | <i>Reference</i>      | <i>Reference</i>      | <i>Reference</i>      | <i>Reference</i>         | <i>Reference</i>         |
| <i>P for trend</i>                        | <b><i>p=0.005</i></b> | <b><i>p=0.102</i></b> | <b><i>p=0.035</i></b> | <b><i>p&lt;0.001</i></b> | <b><i>p&lt;0.001</i></b> |
| <b>Exclusive breastfeeding</b>            |                       |                       |                       |                          |                          |
| <b>n=4,353</b>                            |                       |                       |                       |                          |                          |
| Never<br>(n=416)                          | 1.26 (0.89, 1.78)     | 1.32 (0.88, 1.97)     | 1.69 (0.99, 2.87)     | 2.25 (1.42, 3.57)        | 1.52 (1.23, 1.87)**      |
| Non-exclusive until 4 months<br>(n=2,880) | 1.20 (0.95, 1.51)     | 1.08 (0.81, 1.44)     | 1.23 (0.85, 1.78)     | 1.43 (1.00, 2.05)        | 1.21 (1.04, 1.42)*       |
| Exclusive until 4 months<br>(n=1,057)     | <i>Reference</i>      | <i>Reference</i>      | <i>Reference</i>      | <i>Reference</i>         | <i>Reference</i>         |
| <i>P for trend</i>                        | <b><i>p=0.120</i></b> | <b><i>p=0.214</i></b> | <b><i>p=0065</i></b>  | <b><i>p=0001</i></b>     | <b><i>p&lt;0.001</i></b> |

Values are odds ratios with 95% confidence intervals from generalized estimating equation models.

\*P < 0.05 and \*\*p < 0.01. Models are adjusted for parental age, education, ethnicity, smoking habits, maternal parity, children's sex, gestational age, birth weight, parental history of asthma or atopy, daycare attendance and pet keeping.

**Table S6.** Atopic and infectious effects on the associations of breastfeeding exclusivity with overall estimates of asthma-related symptoms.

|                                     |                                 | Overall Odds Ratios<br>(95% Confidence Interval) |                        |                          |                          |
|-------------------------------------|---------------------------------|--------------------------------------------------|------------------------|--------------------------|--------------------------|
|                                     |                                 | Wheezing                                         | Shortness<br>of breath | Dry cough                | Persistent<br>phlegm     |
| <b>Exclusive<br/>breastfeeding</b>  |                                 |                                                  |                        |                          |                          |
| Model 1                             | Never                           | 1.45**<br>(1.24, 2.69)                           | 1.30**<br>(1.10, 1.53) | 1.26**<br>(1.09, 1.46)   | 1.52**<br>(1.23, 1.87)   |
|                                     | Non-exclusive<br>until 4 months | 1.21**<br>(1.09, 1.34)                           | 1.14*<br>(1.02, 1.28)  | 1.20**<br>(1.10, 1.31)   | 1.21*<br>(1.04, 1.42)    |
|                                     | Exclusive<br>until 4 months     | <i>Reference</i>                                 | <i>Reference</i>       | <i>Reference</i>         | <i>Reference</i>         |
|                                     | <i>P for trend</i>              | <b><i>p&lt;0.001</i></b>                         | <b><i>p=0.001</i></b>  | <b><i>p&lt;0.001</i></b> | <b><i>p&lt;0.001</i></b> |
| Model 1<br>+ adjusted for<br>eczema | Never                           | 1.44**<br>(1.22, 1.68)                           | 1.29**<br>(1.10, 1.52) | 1.26**<br>(1.08, 1.47)   | 1.47**<br>(1.19, 1.81)   |
|                                     | Non-exclusive<br>until 4 months | 1.21**<br>(1.10, 1.35)                           | 1.15*<br>(1.03, 1.30)  | 1.21**<br>(1.10, 1.32)   | 1.21*<br>(1.03, 1.41)    |
|                                     | Exclusive<br>until 4 months     | <i>Reference</i>                                 | <i>Reference</i>       | <i>Reference</i>         | <i>Reference</i>         |
|                                     | <i>P for trend</i>              | <b><i>p&lt;0.001</i></b>                         | <b><i>p=0.001</i></b>  | <b><i>p&lt;0.001</i></b> | <b><i>p&lt;0.001</i></b> |
| Model 1<br>+ adjusted for LRTI      | Never                           | 1.31**<br>(1.11, 1.54)                           | 1.15<br>(0.97, 1.36)   | 1.22*<br>(1.05, 1.42)    | 1.42**<br>(1.15, 1.75)   |
|                                     | Non-exclusive<br>until 4 months | 1.13*<br>(1.02, 1.25)                            | 1.06<br>(0.94, 1.19)   | 1.17**<br>(1.07, 1.28)   | 1.17<br>(1.00, 1.37)     |
|                                     | Exclusive<br>until 4 months     | <i>Reference</i>                                 | <i>Reference</i>       | <i>Reference</i>         | <i>Reference</i>         |
|                                     | <i>P for trend</i>              | <b><i>p=0.001</i></b>                            | <b><i>p=0.114</i></b>  | <b><i>p=0.001</i></b>    | <b><i>p=0.002</i></b>    |

Values are odds ratios with 95% confidence intervals from longitudinal generalized estimating equation models. Children who were exclusively breastfed for 4 months were used as reference category.

\*P < 0.05 and \*\*p < 0.01. Model 1 is adjusted for parental age, education, ethnicity, smoking habits, maternal parity, children's sex, gestational age, birth weight, parental history of asthma or atopy, daycare attendance and pet keeping. This model is additionally adjusted for eczema and lower respiratory tract infections (LRTI) which were both not imputed.

**Figure S2.** Association between breastfeeding exclusivity stratified for parental history of asthma or atopy.

A: no parental history of asthma or atopy; B: parental history of asthma or atopy.

Values are odds ratios with 95% confidence intervals from generalized estimating equation models. Reference group are children who were exclusively breastfed.

\*P < 0.05 and \*\*p < 0.01. Models are adjusted for parental age, education, ethnicity, smoking habits, maternal parity, children's sex, gestational age, birth weight, daycare attendance and pet keeping.

A.

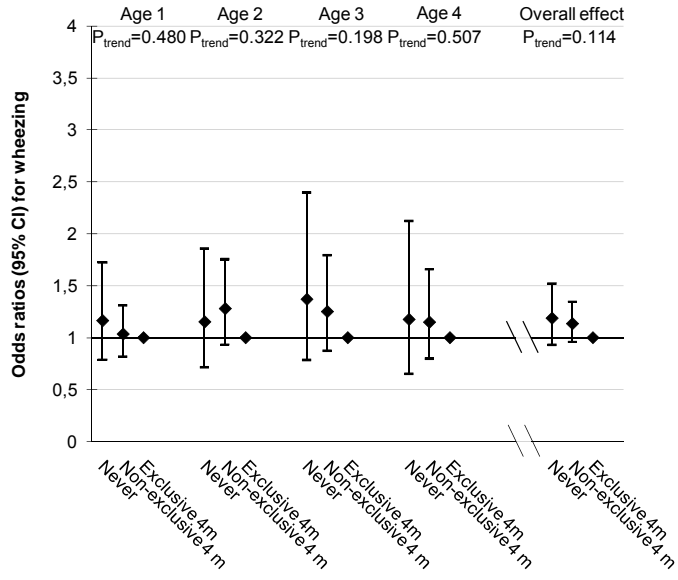

B.

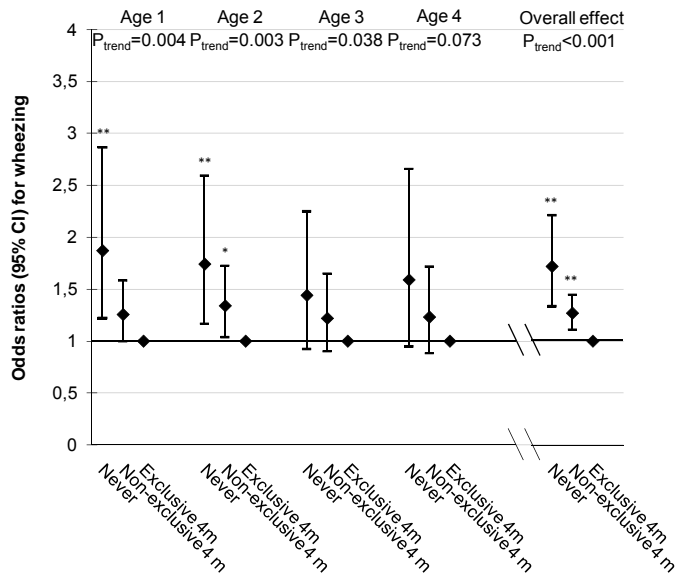

**Table S7** Stratified analysis for parental history of asthma or atopy for the association between breastfeeding exclusivity and wheezing.

|                                        |                              | Odds Ratios (95% Confidence Interval) for wheezing |                     |                   |                   |
|----------------------------------------|------------------------------|----------------------------------------------------|---------------------|-------------------|-------------------|
|                                        |                              | Age 1 year                                         | Age 2 years         | Age 3 years       | Age 4 years       |
| <b>Exclusive breastfeeding</b>         |                              |                                                    |                     |                   |                   |
| No parental history of asthma or atopy | Never                        | 1.16 (0.79, 1.72)                                  | 1.15 (0.72, 1.86)   | 1.37 (0.78, 2.40) | 1.18 (0.65, 2.13) |
|                                        | Non-exclusive until 4 months | 1.04 (0.82, 1.31)                                  | 1.28 (0.93, 1.75)   | 1.25 (0.87, 1.79) | 1.15 (0.80, 1.66) |
|                                        | Exclusive until 4 months     | <i>Reference</i>                                   | <i>Reference</i>    | <i>Reference</i>  | <i>Reference</i>  |
| Parental history of asthma or atopy    | Never                        | 1.78 (1.22, 2.87)**                                | 1.74 (1.17, 2.59)** | 1.44 (0.92, 2.25) | 1.59 (0.95, 2.66) |
|                                        | Non-exclusive until 4 months | 1.26 (1.00, 1.58)                                  | 1.34 (1.04, 1.73)*  | 1.22 (0.90, 1.65) | 1.23 (0.88, 1.72) |
|                                        | Exclusive until 4 months     | <i>Reference</i>                                   | <i>Reference</i>    | <i>Reference</i>  | <i>Reference</i>  |

\*P < 0.05 and \*\*p < 0.01. From generalized estimating equation models for parental age, education, ethnicity, smoking habits, maternal parity, children's sex, gestational age, birth weight, daycare attendance and pet keeping.
